# Supplementary material for: Dietary Pattern and Plasma BCAA-Variations in Healthy Men and Women—Results from the KarMeN Study
Source: MDPI journal article supplement (doi:10.3390/nu10050623), 2018-05-15
Supplement: s1 [file s1]

## Supplementary Materials

**Table S1.** List of assessed amino acids with corresponding coefficient of variation of their respective quality control samples.

| Abbreviation | LongName      | CV   |
|--------------|---------------|------|
| Ala          | Alanine       | 6.2  |
| Arg          | Arginine      | 13.5 |
| Asn          | Asparagine    | 10.7 |
| Asp          | Aspartic acid | 14.6 |
| Cit          | Citrulline    | 20.2 |
| Gln          | Glutamine     | 15.4 |
| Glu          | Glutamic acid | 24.1 |
| Gly          | Glycine       | 21.4 |
| His          | Histidine     | 14.1 |
| Ile          | Isoleucine    | 7.8  |
| Leu          | Leucine       | 8.3  |
| Lys          | Lysine        | 9.7  |
| Met          | Methionine    | 11.0 |
| Orn          | Ornithine     | 11.6 |
| Phe          | Phenylalanine | 6.7  |
| Pro          | Proline       | 8.8  |
| Ser          | Serine        | 17.3 |
| Thr          | Threonine     | 15.6 |
| Trp          | Tryptophan    | 8.8  |
| Tyr          | Tyrosine      | 6.3  |
| Val          | Valine        | 13.8 |

**Table S2.** Description of food groups.

| <b>Food group</b>                        | <b>Foods included</b>                                                                                                                    |
|------------------------------------------|------------------------------------------------------------------------------------------------------------------------------------------|
| Wholemeal bread/rolls                    |                                                                                                                                          |
| White, brown or multigrain bread/rolls   |                                                                                                                                          |
| Cereals and cereal products              | Cereals, flours, rice and processed products like breakfast cereals, pasta, popcorn                                                      |
| Pastries                                 | Cake, pies, savory pastries like filled puff pastries, cheese straw, snacks, peanut flips, cracker, tortilla chips                       |
| Vegetables and vegetable products        |                                                                                                                                          |
| Mushrooms                                |                                                                                                                                          |
| Pulses                                   | Including lentils, chickpeas, green peas, white/broad beans, kidney/soy beans; exception: green beans; incl. canned pulses and as sauce) |
| Potatoes and potato products             | Fresh potatoes, heated and processed products like French fries, potato pancakes, potato chips                                           |
| Fruit and fruit products (without juice) | Including unsweetened frozen fruit, fruit sauces and processed products like sweetened or heated fruit, canned fruit, dried fruit        |
| Nuts and seeds                           | Hazelnuts, peanuts, almonds etc. or processed products like peanut butter, salted or roasted nuts                                        |
| Animal fats                              | Including butter, lard, fish oil                                                                                                         |
| Vegetable fats and oils                  | Including margarine and other spreadable fats (exception: in salad dressings)                                                            |
| Cheese and curd cheese                   | Including soft cheese, cream cheese, acid curd cheese                                                                                    |
| Milk and dairy products                  | Including cocoa drinks, milkshakes, yoghurt, (sour) cream, buttermilk, kefir, whey, milk powder                                          |
| Eggs                                     | Including scrambled, fried and boiled eggs, omelets, soufflé                                                                             |
| Meat and meat products unsmoked          | Including roast, goulash, schnitzel, beef olive, minced meat, meat balls, ground meat sauce                                              |
| Sausages and meat products smoked        | Including salami, liver sausage, ham, bacon, cured pork, meat loaf, bratwurst                                                            |
| Fish and fish products                   | Salt- and freshwater fish, shrimps, mussels, snails, processed products like caviar, tinned fish                                         |
| Soups                                    | Soups without stews                                                                                                                      |
| Sauces                                   | Including warm and cold sauces (e.g. ketchup, salad dressing), mustard, vinegar etc.; exceptions: fruit-, vegetable-, ground meat sauce  |

|                               |                                                                                                                                                                                                                                                                                                                                                                                                                               |
|-------------------------------|-------------------------------------------------------------------------------------------------------------------------------------------------------------------------------------------------------------------------------------------------------------------------------------------------------------------------------------------------------------------------------------------------------------------------------|
| Sweets                        | Including sweets with chocolate, confectionaries, candies, fruit gums, cereal bars                                                                                                                                                                                                                                                                                                                                            |
| Ice cream                     |                                                                                                                                                                                                                                                                                                                                                                                                                               |
| Sweet spreads                 | Jam, jellies, honey and chocolate spreads                                                                                                                                                                                                                                                                                                                                                                                     |
| Desserts                      | Creams and desserts including pudding, semolina, tiramisu                                                                                                                                                                                                                                                                                                                                                                     |
| Water                         |                                                                                                                                                                                                                                                                                                                                                                                                                               |
| Coffee and tea (black/green)  |                                                                                                                                                                                                                                                                                                                                                                                                                               |
| Herbal/fruit tea              |                                                                                                                                                                                                                                                                                                                                                                                                                               |
| Fruit juices/nectars          | including spritzer                                                                                                                                                                                                                                                                                                                                                                                                            |
| Soft drinks                   | e.g. lemonades, bitter lemon (incl. low-calorie drinks)                                                                                                                                                                                                                                                                                                                                                                       |
| Other non-alcoholic beverages | e.g. malt coffee, malt beer, non-alcoholic beer, vegetable juices                                                                                                                                                                                                                                                                                                                                                             |
| Beer                          | including mixed beer drinks                                                                                                                                                                                                                                                                                                                                                                                                   |
| Wine and sparkling wine       |                                                                                                                                                                                                                                                                                                                                                                                                                               |
| Spirits                       | schnapps, liqueurs                                                                                                                                                                                                                                                                                                                                                                                                            |
| Other alcoholic beverages     | e.g. alcopops, cocktails                                                                                                                                                                                                                                                                                                                                                                                                      |
| Miscellaneous                 | Milk substitutes (e.g. soy products (milk, yoghurt, cheese), coconut-, rice-, oat-, almond milk, cereal milk with soy),<br>meat substitutes (e.g. tofu, tempeh, soy protein, vegetarian sausages), cereal substitutes (e.g. soy flour/flakes,<br>lupines), sweeteners, sugar substitutes, beverage powders/ -granules (e.g. cocoa powder, lemonade powder), herbs,<br>spices, vegetarian spreads, protein powder, yeast, miso |

---

**Table S3.** Optimized lambda-values for BoxCox-transformation of BCAA and habitual diet food groups.

| BoxCox-transformed variable              | $\lambda$ |
|------------------------------------------|-----------|
| isoleucine                               | 0.13      |
| valine                                   | 0.12      |
| leucine                                  | 0.29      |
| Wholemeal bread/rolls                    | 0.41      |
| White, brown or multigrain bread/rolls   | 0.72      |
| Cereals and cereal products              | 0.09      |
| Pastries                                 | 0.69      |
| Pulses                                   | 0         |
| Vegetables and vegetable products        | 0.63      |
| Mushrooms                                | 0         |
| Potatoes and potato products             | 0         |
| Fruit and fruit products (without juice) | 0.87      |
| Nuts and seeds                           | 0         |
| Animal fats                              | 0.44      |
| Vegetable fats and oils                  | 0.08      |
| Milk and dairy products                  | 0.77      |
| Cheese and curd cheese                   | 0.79      |
| Eggs                                     | 0.43      |
| Meat and meat products unsmoked          | 0.67      |
| Sausages and meat products smoked        | 0.54      |
| Fish and fish products                   | 0.89      |
| Soups                                    | 0.37      |
| Sauces                                   | 0.97      |
| Sweets                                   | 0.55      |
| Ice cream                                | 0.37      |
| Sweet spreads                            | 0.39      |
| Desserts                                 | 0.6       |
| Water                                    | 0.58      |
| Coffee and tea (black/green)             | 0.97      |
| Herbal/fruit tea                         | 0.21      |
| Fruit juices/nectars                     | 0.39      |
| Soft drinks                              | 0.21      |
| Other non-alcoholic beverages            | 0.32      |
| Beer                                     | 0.32      |
| Wine and sparkling wine                  | 0.36      |
| Spirits and other alcoholic beverages    | 0.67      |
| Miscellaneous                            | 0         |

BoxCox-transformation: for  $\lambda > 0$ ,  $x = (y^\lambda - 1) / \lambda$ ; for  $\lambda = 0$ ,  $x = \log(y)$ .

**Table S4.** RRR-derived current and habitual dietary patterns with respective factor loadings of food groups and their explained variance for plasma BCAA concentrations.

| explained variance of BCAA (%)         | current diet |              |              | habitual diet |              |              |
|----------------------------------------|--------------|--------------|--------------|---------------|--------------|--------------|
|                                        | pattern1     | pattern2     | pattern3     | pattern1      | pattern2     | pattern3     |
|                                        | 19.2         | 3.6          | 0.6          | 32.5          | 3.3          | 0.4          |
| food group                             | loading      | loading      | loading      | loading       | loading      | loading      |
| Sauces                                 | <b>0.50</b>  | 0.04         | 0.12         | <b>0.45</b>   | -0.14        | -0.12        |
| Meat and meat products unsmoked        | <b>0.37</b>  | 0.16         | -0.13        | <b>0.37</b>   | 0.02         | 0.08         |
| Sausages and meat products smoked      | <b>0.39</b>  | -0.11        | -0.15        | <b>0.34</b>   | -0.15        | 0.12         |
| Beer                                   | <b>0.22</b>  | -0.01        | 0.02         | <b>0.24</b>   | -0.14        | -0.13        |
| Soft drinks                            | <b>0.23</b>  | -0.19        | 0.17         | <b>0.21</b>   | <b>-0.37</b> | -0.02        |
| Desserts                               | -0.06        | -0.02        | -0.02        | <b>0.21</b>   | 0.02         | -0.05        |
| White, brown or multigrain bread/rolls | 0.09         | -0.09        | -0.09        | 0.20          | -0.20        | 0.06         |
| Cereals and cereal products            | 0.09         | -0.14        | 0.16         | 0.20          | <b>-0.21</b> | 0.19         |
| Eggs                                   | 0.16         | 0.13         | <b>-0.25</b> | 0.19          | <b>0.24</b>  | 0.04         |
| Spirits & other alcoholic beverages    | 0.05         | <b>-0.21</b> | -0.03        | 0.16          | -0.04        | -0.06        |
| Ice cream                              | 0.08         | <b>-0.34</b> | -0.14        | 0.15          | <b>-0.24</b> | 0.11         |
| Vegetable fats and oils                | 0.18         | -0.02        | -0.13        | 0.14          | -0.12        | 0.15         |
| Sweets                                 | 0.05         | -0.06        | <b>-0.34</b> | 0.13          | 0.04         | 0.19         |
| Mushrooms                              | 0.07         | <b>0.20</b>  | 0.05         | 0.00          | 0.12         | 0.07         |
| Fish and fish products                 | -0.01        | <b>0.35</b>  | -0.11        | -0.11         | <b>0.32</b>  | -0.03        |
| Coffee and tea (black/green)           | -0.18        | 0.17         | -0.04        | -0.11         | 0.19         | -0.18        |
| Fruit juices/nectars                   | 0.10         | -0.01        | <b>-0.20</b> | 0.11          | -0.16        | 0.13         |
| Milk and dairy products                | 0.12         | <b>0.38</b>  | <b>0.34</b>  | 0.11          | <b>0.25</b>  | <b>-0.56</b> |
| Water                                  | 0.14         | -0.14        | 0.19         | 0.10          | -0.06        | -0.06        |
| Soups                                  | -0.07        | <b>-0.24</b> | 0.05         | -0.09         | <b>-0.22</b> | -0.07        |
| Nuts and seeds                         | <b>-0.22</b> | <b>0.29</b>  | -0.04        | -0.08         | <b>0.21</b>  | <b>-0.25</b> |

---

|                                          |       |             |              |              |              |              |
|------------------------------------------|-------|-------------|--------------|--------------|--------------|--------------|
| Miscellaneous                            | -0.16 | 0.03        | <b>-0.31</b> | -0.06        | 0.03         | <b>0.26</b>  |
| Other non-alcoholic beverages            | 0.06  | 0.14        | <b>0.20</b>  | 0.05         | 0.01         | -0.14        |
| Cheese and curd cheese                   | 0.00  | -0.06       | -0.07        | 0.04         | -0.12        | -0.06        |
| Sweet spreads                            | -0.05 | -0.06       | 0.02         | 0.04         | -0.11        | -0.19        |
| Animal fats                              | 0.02  | <b>0.23</b> | <b>-0.28</b> | 0.03         | 0.04         | 0.18         |
| Potatoes and potato products             | 0.04  | -0.06       | <b>-0.33</b> | -0.03        | -0.08        | 0.01         |
| Wholemeal bread/rolls                    | -0.12 | 0.09        | 0.12         | 0.02         | 0.05         | <b>-0.22</b> |
| Vegetables and vegetable products        | 0.05  | 0.01        | -0.01        | -0.02        | -0.19        | -0.04        |
| Wine and sparkling wine                  | 0.09  | -0.17       | -0.10        | 0.02         | <b>-0.27</b> | -0.11        |
| Pastries                                 | 0.03  | -0.10       | 0.09         | 0.01         | -0.07        | 0.05         |
| Pulses                                   | 0.08  | -0.07       | -0.14        | <b>-0.25</b> | -0.18        | 0.04         |
| Herbal/fruit tea                         | -0.18 | 0.17        | <b>-0.21</b> | -0.14        | 0.13         | 0.02         |
| Fruit and fruit products (without juice) | -0.19 | <b>0.23</b> | 0.18         | -0.14        | <b>0.23</b>  | <b>-0.40</b> |

---

\* Sorted according to strength of factor loadings for the first habitual dietary pattern; factor loadings >|0.2| are marked **bold**.

**Table S5.** Average consumption of food groups with corresponding 95% confidence intervals by quartiles of age, sex, and energy intake adjusted habitual dietary pattern score.

| Food Group (g/day)                       | Q1 (n = 74) |      |      | Q2 (n = 75) |      |      | Q3 (n = 75) |      |      | Q4 (n = 74) |      |       | p <sub>trend</sub> |
|------------------------------------------|-------------|------|------|-------------|------|------|-------------|------|------|-------------|------|-------|--------------------|
|                                          | Mean        | LCL  | UCL  | Mean        | LCL  | UCL  | Mean        | LCL  | UCL  | Mean        | LCL  | UCL   |                    |
| Wholemeal bread/rolls                    | 50.1        | 41.4 | 58.8 | 51.6        | 41.5 | 61.7 | 48.5        | 40.4 | 56.5 | 44.2        | 36.3 | 52.1  | 0.56               |
| White, brown or multigrain bread/rolls   | 78.2        | 67.6 | 88.9 | 81.7        | 71.3 | 92.1 | 88.1        | 78.2 | 98.1 | 94.6        | 84.0 | 105.2 | 0.02               |
| Cereals and cereal products              | 124         | 112  | 136  | 109         | 95   | 123  | 99          | 87   | 112  | 114         | 100  | 128   | 0.02               |
| Pastries                                 | 64.3        | 58.0 | 70.6 | 68.2        | 60.7 | 75.6 | 59.7        | 53.1 | 66.3 | 63.0        | 56.2 | 69.7  | 0.51               |
| Pulses                                   | 7.1         | 5.4  | 8.8  | 6.9         | 4.6  | 9.3  | 4.1         | 3.1  | 5.1  | 5.2         | 1.9  | 8.4   | <.0001             |
| Vegetables and vegetable products        | 201         | 184  | 219  | 194         | 181  | 207  | 189         | 176  | 201  | 186         | 172  | 201   | 0.04               |
| Mushrooms                                | 4.7         | 4.3  | 5.1  | 4.5         | 4.1  | 4.8  | 4.3         | 4.0  | 4.6  | 3.9         | 3.7  | 4.1   | 0.0001             |
| Potatoes and potato products             | 57.2        | 50.0 | 64.4 | 52.0        | 45.7 | 58.4 | 59.0        | 52.3 | 65.7 | 52.9        | 46.1 | 59.8  | 0.07               |
| Fruit and fruit products (without juice) | 230         | 203  | 258  | 203         | 176  | 230  | 203         | 181  | 226  | 179         | 154  | 205   | 0.0002             |
| Nuts and seeds                           | 11.4        | 8.5  | 14.3 | 6.7         | 4.3  | 9.1  | 5.3         | 3.8  | 6.8  | 5.4         | 3.4  | 7.4   | 0.0001             |
| Animal fats                              | 9.9         | 7.5  | 12.4 | 8.4         | 6.4  | 10.4 | 9.6         | 8.0  | 11.2 | 7.1         | 5.7  | 8.5   | 0.78               |
| Vegetable fats and oils                  | 9.5         | 6.5  | 12.5 | 9.4         | 7.6  | 11.1 | 8.6         | 7.0  | 10.1 | 10.2        | 8.7  | 11.7  | 0.06               |
| Milk and dairy products                  | 183         | 159  | 207  | 194         | 169  | 219  | 184         | 160  | 208  | 189         | 168  | 211   | 0.58               |
| Cheese and curd cheese                   | 63.9        | 55.7 | 72.1 | 63.9        | 57.9 | 70.0 | 62.8        | 57.6 | 68.0 | 67.6        | 60.3 | 74.9  | 0.34               |
| Eggs                                     | 14.7        | 9.9  | 19.6 | 13.3        | 11.3 | 15.4 | 14.3        | 12.2 | 16.5 | 19.6        | 15.7 | 23.5  | <.0001             |
| Meat and meat products unsmoked          | 32.0        | 26.2 | 37.8 | 42.6        | 37.1 | 48.2 | 50.9        | 43.4 | 58.3 | 67.7        | 60.6 | 74.8  | <.0001             |
| Sausages and meat products smoked        | 20.3        | 14.8 | 25.7 | 34.4        | 27.4 | 41.4 | 45.4        | 38.6 | 52.3 | 63.4        | 53.9 | 72.8  | <.0001             |
| Fish and fish products                   | 17.6        | 15.8 | 19.5 | 17.3        | 15.6 | 19.0 | 15.9        | 14.5 | 17.4 | 15.0        | 13.5 | 16.6  | 0.28               |
| Soups                                    | 60.1        | 47.1 | 73.0 | 41.5        | 32.9 | 50.2 | 57.2        | 45.4 | 69.0 | 48.3        | 37.4 | 59.2  | 0.44               |
| Sauces                                   | 31.0        | 27.8 | 34.1 | 33.0        | 30.2 | 35.9 | 36.8        | 34.3 | 39.2 | 44.8        | 41.7 | 48.0  | <.0001             |
| Sweets                                   | 14.4        | 12.5 | 16.3 | 14.6        | 12.4 | 16.9 | 13.1        | 11.2 | 15.1 | 13.7        | 11.5 | 15.8  | 0.33               |
| Ice cream                                | 8.2         | 6.2  | 10.2 | 9.4         | 7.1  | 11.6 | 11.1        | 7.6  | 14.6 | 14.0        | 10.8 | 17.2  | 0.0002             |
| Sweet spreads                            | 13.6        | 10.6 | 16.7 | 12.0        | 9.3  | 14.7 | 11.2        | 9.0  | 13.3 | 13.5        | 10.2 | 16.7  | 0.86               |

|                                       |      |      |       |       |      |       |       |      |       |       |      |       |      |
|---------------------------------------|------|------|-------|-------|------|-------|-------|------|-------|-------|------|-------|------|
| Desserts                              | 9.5  | 7.7  | 11.3  | 9.4   | 7.6  | 11.3  | 8.6   | 7.1  | 10.2  | 10.8  | 9.0  | 12.6  | 0.38 |
| Water                                 | 1467 | 1287 | 1648  | 1331  | 1162 | 1499  | 1427  | 1268 | 1585  | 1578  | 1413 | 1742  | 0.86 |
| Coffee and tea (black/green)          | 536  | 449  | 623   | 510   | 438  | 583   | 533   | 452  | 614   | 462   | 384  | 540   | 0.60 |
| Herbal/fruit tea                      | 233  | 150  | 315   | 225   | 139  | 311   | 208   | 123  | 292   | 136   | 79   | 192   | 0.14 |
| Fruit juices/nectars                  | 155  | 122  | 189   | 125   | 96   | 153   | 133   | 101  | 164   | 140   | 112  | 167   | 0.56 |
| Soft drinks                           | 40.4 | 22.3 | 58.5  | 100.8 | 42.5 | 159.0 | 48.5  | 17.9 | 79.1  | 94.6  | 50.5 | 138.7 | 0.23 |
| Other non-alcoholic beverages         | 24.0 | 16.1 | 31.9  | 36.0  | 26.0 | 46.0  | 26.0  | 16.2 | 35.9  | 21.9  | 13.3 | 30.5  | 0.52 |
| Beer                                  | 81.8 | 55.3 | 108.4 | 80.9  | 44.0 | 117.8 | 118.8 | 78.7 | 158.9 | 109.3 | 75.0 | 143.6 | 0.15 |
| Wine and sparkling wine               | 47.0 | 35.1 | 59.0  | 41.7  | 28.8 | 54.5  | 51.2  | 35.0 | 67.4  | 46.4  | 33.3 | 59.4  | 0.42 |
| Spirits and other alcoholic beverages | 1.2  | 0.9  | 1.4   | 1.0   | 0.8  | 1.2   | 1.2   | 0.9  | 1.5   | 1.4   | 1.1  | 1.6   | 0.11 |
| Miscellaneous                         | 43.2 | 21.8 | 64.5  | 16.3  | 8.5  | 24.0  | 19.8  | 9.2  | 30.4  | 8.0   | 4.7  | 11.3  | 0.04 |

Abbreviations: LCL, lower 95% confidence limit; UCL, upper 95% confidence limit.
